# Supplementary material
Source: PubMed Central journal article supplement (PMC4749497)
Supplement: 15_197_Pribis_Suppl.pdf [file 15_197_Pribis_Suppl.pdf]

## Supplemental Data

# The HIV Protease Inhibitor Saquinavir Inhibits HMGB1-Driven Inflammation by Targeting the Interaction of Cathepsin V with TLR4/MyD88

John P Pribis,<sup>1,2</sup> Yousef Al-Abed,<sup>3,4</sup> Huan Yang,<sup>3\*</sup> Domokos Gero,<sup>5\*</sup> Hongbo Xu,<sup>1,6\*</sup> Marcelo F Montenegro,<sup>1\*</sup> Eileen M Bauer,<sup>1</sup> Sodam Kim,<sup>1</sup> Sangeeta S Chavan,<sup>3</sup> Changchun Cai,<sup>1</sup> Tunliang Li,<sup>1,6</sup> Petra Szoleczky,<sup>5</sup> Csaba Szabo,<sup>5</sup> Kevin J Tracey,<sup>3</sup> and Timothy R Billiar<sup>1</sup>

Online address: <http://www.molmed.org>

The Feinstein Institute  
for Medical Research   
Empowering Imagination. Pioneering Discovery.®

**Supplementary Table S1.** ActiTarget-P screen of protease Inhibitors identifies three hit compounds capable of attenuating HMGB1 induced TNF- $\alpha$  in RAW 264.7 macrophages.

| Name     | Relative TNF- $\alpha$ response % | HIT?       | Name     | Relative TNF- $\alpha$ response % | HIT? | Name     | Relative TNF- $\alpha$ response % | HIT? | Name     | Relative TNF- $\alpha$ response % | HIT? | Name     | Relative TNF- $\alpha$ response % | HIT? |
|----------|-----------------------------------|------------|----------|-----------------------------------|------|----------|-----------------------------------|------|----------|-----------------------------------|------|----------|-----------------------------------|------|
| ST057867 | 63.8                              | <b>hit</b> | ST057866 | 99.5                              |      | ST057914 | 108.6                             |      | ST057986 | 122.9                             |      | ST057829 | 96.0                              |      |
| ST057901 | 100.4                             |            | ST057929 | 98.6                              |      | ST058062 | 111.7                             |      | ST057998 | 106.7                             |      | ST057924 | 95.8                              |      |
| ST057883 | 94.6                              |            | ST057983 | 117.8                             |      | ST057984 | 115.2                             |      | ST057781 | 101.7                             |      | ST057691 | 98.3                              |      |
| ST057937 | 101.1                             |            | ST057934 | 110.8                             |      | ST057857 | 92.7                              |      | ST057987 | 106.7                             |      | ST057931 | 96.5                              |      |
| ST058055 | 112.8                             |            | ST057779 | 92.2                              |      | ST057992 | 109.4                             |      | ST057996 | 117.4                             |      | ST052697 | 106.0                             |      |
| ST057887 | 106.0                             |            | ST057796 | 98.3                              |      | ST057947 | 104.5                             |      | ST057952 | 111.9                             |      | ST057890 | 96.7                              |      |
| ST057911 | 106.7                             |            | ST057825 | 79.7                              |      | ST057855 | 96.2                              |      | ST057833 | 91.3                              |      | ST057888 | 108.9                             |      |
| ST057955 | 113.5                             |            | ST057902 | 112.6                             |      | ST057840 | 96.2                              |      | ST057807 | 91.2                              |      | ST058083 | 119.3                             |      |
| ST057832 | 84.7                              |            | ST057851 | 94.0                              |      | ST057875 | 93.5                              |      | ST057949 | 100.1                             |      | ST057862 | 96.4                              |      |
| ST057880 | 124.0                             |            | ST057795 | 102.3                             |      | ST057856 | 105.6                             |      | ST057985 | 130.0                             |      | ST057928 | 118.1                             |      |
| ST058067 | 129.0                             |            | ST057917 | 101.1                             |      | ST057853 | 88.8                              |      | ST057936 | 101.4                             |      | ST057831 | 95.3                              |      |
| ST057994 | 145.6                             |            | ST057057 | 95.2                              |      | ST057861 | 98.7                              |      | ST058079 | 100.3                             |      | ST057945 | 101.5                             |      |
| ST058090 | 107.0                             |            | ST057894 | 100.4                             |      | ST057908 | 96.9                              |      | ST058002 | 120.9                             |      | ST057926 | 115.9                             |      |
| ST057897 | 105.0                             |            | ST057784 | 92.2                              |      | ST057882 | 120.7                             |      | ST057900 | 102.8                             |      | ST058116 | 109.4                             |      |
| ST052689 | 99.0                              |            | ST058076 | 104.5                             |      | ST057852 | 95.8                              |      | ST057780 | 90.3                              |      | ST057878 | 94.0                              |      |
| ST058113 | 119.6                             |            | ST058066 | 122.1                             |      | ST057898 | 104.1                             |      | ST057939 | 109.7                             |      | ST057799 | 89.9                              |      |
| ST058054 | 109.9                             |            | ST057860 | 93.3                              |      | ST052688 | 100.7                             |      | ST057886 | 92.7                              |      | ST057870 | 95.9                              |      |
| ST058075 | 122.6                             |            | ST058112 | 117.9                             |      | ST058008 | 109.9                             |      | ST058064 | 108.1                             |      | ST058043 | 127.8                             |      |
| ST057822 | 88.7                              |            | ST057921 | 108.9                             |      | ST057918 | 102.9                             |      | ST058001 | 132.3                             |      | ST058071 | 107.3                             |      |
| ST057925 | 100.5                             |            | ST057916 | 102.7                             |      | ST057858 | 106.5                             |      | ST057797 | 87.2                              |      | ST052657 | 86.8                              |      |
| ST057909 | 101.6                             |            | ST057905 | 98.3                              |      | ST057944 | 102.6                             |      | ST052667 | 96.3                              |      | ST057844 | 87.8                              |      |
| ST057881 | 95.5                              |            | ST057863 | 98.3                              |      | ST058094 | 112.7                             |      | ST057885 | 97.6                              |      | ST057990 | 117.2                             |      |
| ST057993 | 120.2                             |            | ST052687 | 97.0                              |      | ST057943 | 110.2                             |      | ST057940 | 98.6                              |      | ST057941 | 116.9                             |      |
| ST058091 | 101.8                             |            | ST058003 | 117.2                             |      | ST057912 | 120.2                             |      | ST058078 | 101.7                             |      | ST058084 | 124.9                             |      |
| ST057871 | 100.9                             |            | ST058061 | 98.7                              |      | ST057848 | 102.1                             |      | ST057988 | 106.7                             |      | ST058006 | 120.6                             |      |
| ST057785 | 87.6                              |            | ST057854 | 90.1                              |      | ST057827 | 88.5                              |      | ST058077 | 108.1                             |      | ST058082 | 109.8                             |      |
| ST057864 | 93.7                              |            | ST057874 | 104.7                             |      | ST058060 | 97.5                              |      | ST058000 | 121.3                             |      | ST057989 | 107.4                             |      |
| ST058092 | 105.3                             |            | ST057915 | 102.1                             |      | ST058063 | 97.5                              |      | ST057791 | 98.0                              |      | ST058074 | 125.8                             |      |

Continued on next page

Supplementary Table S1. *Continued.*

|          |       |          |       |          |       |          |       |          |       |
|----------|-------|----------|-------|----------|-------|----------|-------|----------|-------|
| ST058056 | 102.5 | ST058065 | 107.3 | ST058114 | 113.6 | ST052696 | 88.4  | ST058005 | 102.5 |
| ST057872 | 107.7 | ST057850 | 87.7  | ST058080 | 116.6 | ST057845 | 93.1  | ST058107 | 100.8 |
| ST057838 | 85.4  | ST057873 | 97.4  | ST057859 | 94.7  | ST057938 | 107.3 | ST057892 | 96.4  |
| ST057865 | 77.3  | ST057903 | 102.9 | ST057798 | 90.5  | ST057950 | 108.9 | ST057956 | 113.2 |
| ST057951 | 99.1  | ST057919 | 101.0 | ST057999 | 119.5 | ST057995 | 128.8 | ST057846 | 85.0  |
| ST057884 | 98.9  | ST057922 | 105.8 | ST058059 | 146.3 | ST058068 | 100.2 | ST057836 | 83.5  |
| ST057889 | 97.3  | ST057847 | 82.4  | ST058007 | 106.9 | ST057907 | 111.7 | ST057835 | 95.9  |
| ST057904 | 112.5 | ST057906 | 102.2 | ST057991 | 114.8 | ST057981 | 115.7 | ST057879 | 102.0 |
| ST058057 | 116.1 | ST058058 | 116.7 | ST057913 | 111.4 | ST057982 | 112.3 | ST057953 | 112.3 |
| ST057910 | 113.1 | ST057920 | 116.5 | ST057979 | 95.2  | ST057843 | 89.2  | ST057834 | 98.8  |
| ST057876 | 96.3  | ST057849 | 90.9  | ST052655 | 105.3 | ST057923 | 102.1 | ST057927 | 105.4 |
| ST055416 | 99.6  | ST057808 | 75.6  | ST059023 | 96.0  | ST025517 | 84.5  | ST058974 | 94.5  |
| ST057893 | 93.3  | ST058009 | 110.9 | ST058014 | 125.2 | ST058045 | 102.2 | ST058096 | 123.7 |
| ST058072 | 108.6 | ST033470 | 91.4  | ST057812 | 102.1 | ST059022 | 107.9 | ST058042 | 112.7 |
| ST057841 | 89.5  | ST058261 | 97.2  | ST057974 | 122.9 | ST058041 | 106.7 | ST011763 | 103.9 |
| ST058176 | 107.7 | ST033332 | 93.5  | ST057800 | 97.1  | ST058264 | 88.9  | ST056692 | 96.0  |
| ST057891 | 103.9 | ST058023 | 93.6  | ST058012 | 112.2 | ST058040 | 101.6 | ST058031 | 105.0 |
| ST058085 | 104.0 | ST058015 | 112.5 | ST058020 | 99.8  | ST058101 | 105.1 | ST058189 | 128.8 |
| ST058173 | 110.5 | ST025586 | 101.6 | ST057977 | 120.7 | ST057960 | 97.0  | ST057970 | 104.7 |
| ST058093 | 108.7 | ST058046 | 103.9 | ST057969 | 128.5 | ST057961 | 109.5 | ST055689 | 88.4  |
| ST057957 | 96.9  | ST057811 | 97.0  | ST057975 | 106.7 | ST057816 | 88.3  | ST057803 | 99.4  |
| ST057782 | 84.5  | ST057967 | 112.9 | ST057793 | 96.0  | ST058311 | 97.9  | ST059722 | 97.3  |
| ST057896 | 111.4 | ST058024 | 100.2 | ST058016 | 99.1  | ST058032 | 105.0 | ST069152 | 96.0  |
| ST057842 | 85.5  | ST057809 | 89.6  | ST058017 | 115.6 | ST060149 | 105.5 | ST058106 | 96.4  |
| ST057930 | 99.3  | ST058257 | 98.7  | ST057962 | 101.6 | ST058102 | 115.6 | ST069167 | 101.5 |
| ST057830 | 92.9  | ST058051 | 128.2 | ST058044 | 102.0 | ST069147 | 110.0 | ST058095 | 121.2 |
| ST057868 | 101.3 | ST058037 | 103.6 | ST058025 | 101.9 | ST057978 | 121.9 | ST058932 | 100.7 |
| ST057877 | 94.8  | ST058310 | 100.9 | ST058100 | 99.6  | ST052895 | 88.7  | ST059357 | 87.1  |
| ST057933 | 97.3  | ST057776 | 84.6  | ST057773 | 92.9  | ST058519 | 105.3 | ST058521 | 114.4 |
| ST058070 | 106.4 | ST058177 | 119.7 | ST069148 | 97.1  | ST057806 | 90.3  | ST058186 | 121.5 |
| ST058086 | 102.4 | ST058097 | 122.8 | ST057971 | 97.9  | ST058021 | 111.3 | ST057965 | 100.8 |
| ST058260 | 102.8 | ST058018 | 135.2 | ST057973 | 101.1 | ST058206 | 116.9 | ST032255 | 88.4  |
| ST057828 | 98.5  | ST059396 | 107.1 | ST058036 | 103.2 | ST057787 | 94.6  | ST058193 | 115.7 |
| ST057932 | 104.8 | ST057814 | 88.1  | ST058175 | 108.8 | ST058198 | 107.8 | ST058214 | 114.9 |
| ST057954 | 96.4  | ST057968 | 109.9 | ST058262 | 95.0  | ST069156 | 110.1 | ST058301 | 116.2 |
| ST058171 | 98.5  | ST057778 | 105.3 | ST069144 | 102.2 | ST027884 | 96.3  | ST058144 | 105.8 |
| ST057948 | 106.3 | ST058053 | 101.3 | ST057813 | 102.0 | ST069154 | 107.6 | ST058142 | 94.8  |
| ST057895 | 116.3 | ST058033 | 103.0 | ST058258 | 114.0 | ST057959 | 103.3 | ST069155 | 108.9 |
| ST052658 | 92.3  | ST005021 | 101.2 | ST058052 | 97.4  | ST058223 | 99.8  | ST058143 | 109.3 |
| ST057942 | 128.3 | ST058029 | 104.5 | ST057972 | 102.1 | ST058099 | 123.0 | ST058141 | 102.3 |
| ST058259 | 108.3 | ST058098 | 109.5 | ST057777 | 100.4 | ST057694 | 105.0 | ST059353 | 85.5  |
| ST057935 | 99.9  | ST057775 | 95.3  | ST057772 | 98.9  | ST058022 | 100.0 | ST058980 | 103.6 |
| ST057824 | 94.9  | ST058027 | 115.3 | ST058103 | 116.6 | ST058190 | 105.8 | ST033516 | 85.7  |
| ST057056 | 101.3 | ST057786 | 91.7  | ST058104 | 107.3 | ST069158 | 100.9 | ST058039 | 98.5  |
| ST057789 | 91.7  | ST057792 | 94.8  | ST057818 | 94.0  | ST069145 | 107.8 | ST058241 | 94.0  |
| ST058174 | 95.2  | ST058028 | 117.1 | ST057801 | 97.9  | ST058520 | 122.4 | ST055843 | 87.1  |
| ST057997 | 127.9 | ST057794 | 92.4  | ST057805 | 80.4  | ST058191 | 104.0 | ST059355 | 89.9  |
| ST057869 | 85.7  | ST058111 | 104.3 | ST057958 | 105.0 | ST059391 | 97.0  | ST059356 | 86.2  |
| ST057790 | 93.1  | ST057976 | 119.6 | ST058185 | 122.9 | ST057774 | 97.0  | ST058019 | 120.3 |
| ST058073 | 102.6 | ST057815 | 83.6  | ST058034 | 113.4 | ST058931 | 87.9  | ST034238 | 90.1  |
| ST058172 | 101.5 | ST057964 | 108.8 | ST058050 | 110.1 | ST069151 | 102.6 | ST003381 | 103.6 |
| ST057837 | 93.3  | ST058263 | 95.1  | ST058105 | 107.9 | ST058195 | 108.5 | ST059352 | 79.7  |
| ST033471 | 89.1  | ST057804 | 103.3 | ST058038 | 105.8 | ST058168 | 125.9 | ST059350 | 84.4  |
| ST057823 | 96.9  | ST058035 | 122.7 | ST058979 | 89.3  | ST057963 | 98.9  | ST058238 | 109.5 |
| ST057899 | 105.9 | ST058013 | 101.5 | ST058048 | 101.9 | ST058047 | 98.2  | ST058203 | 125.4 |

*Continued on next page*

Supplementary Table S1. *Continued.*

|          |       |          |       |                 |             |            |          |          |          |      |
|----------|-------|----------|-------|-----------------|-------------|------------|----------|----------|----------|------|
| ST058069 | 115.2 | ST057966 | 109.4 | ST057788        | 100.0       | ST069157   | 98.5     | ST058129 | 104.5    |      |
| ST058010 | 110.1 | ST057810 | 92.3  | ST003932        | 104.7       | ST058049   | 104.4    | ST059351 | 86.7     |      |
| ST057826 | 89.0  | ST058026 | 108.2 | ST057416        | 90.2        | ST058212   | 125.3    | ST058150 | 98.7     |      |
| ST058011 | 123.8 | ST058030 | 103.7 | ST058300        | 101.7       | ST057817   | 97.0     | ST058216 | 117.5    |      |
| ST059361 | 90.0  | ST059340 | 86.2  | ST055935        | 93.9        | ST040137   | 106.4    | ST059010 | 103.0    |      |
| ST058140 | 104.9 | ST059334 | 88.4  | ST054523        | 93.8        | ST059323   | 87.3     | ST059369 | 103.0    |      |
| ST058196 | 106.0 | ST059347 | 86.2  | ST058217        | 112.4       | ST059552   | 100.8    | ST019259 | 83.6     |      |
| ST069153 | 99.3  | ST059198 | 89.5  | ST047092        | 92.2        | ST059372   | 109.7    | ST059378 | 99.3     |      |
| ST055705 | 92.1  | ST058182 | 107.0 | ST015985        | 108.3       | ST058563   | 91.1     | ST059381 | 95.0     |      |
| ST058181 | 102.6 | ST011321 | 96.9  | ST058600        | 91.1        | ST058565   | 97.2     | ST059802 | 107.1    |      |
| ST069149 | 101.9 | ST059393 | 90.8  | ST015539        | 101.7       | ST058729   | 99.3     | ST059315 | 83.1     |      |
| ST058157 | 111.2 | ST069159 | 99.2  | ST059377        | 93.6        | ST059397   | 116.1    | ST058524 | 95.7     |      |
| ST058204 | 116.9 | ST011309 | 95.1  | ST058242        | 101.7       | ST059367   | 101.3    | ST058526 | 101.7    |      |
| ST057693 | 98.3  | ST011311 | 98.9  | ST015472        | 105.4       | ST058572   | 95.4     | ST015382 | 105.7    |      |
| ST011307 | 103.6 | ST033187 | 93.1  | ST019004        | 99.0        | ST039694   | 86.7     | ST058525 | 90.3     |      |
| ST059360 | 84.9  | ST059333 | 111.9 | ST059390        | 92.8        | ST059322   | 85.1     | ST015374 | 103.1    |      |
| ST058205 | 116.3 | ST059392 | 91.5  | ST059389        | 113.1       | ST037712   | 97.2     | ST056812 | 118.5    |      |
| ST058187 | 98.5  | ST055910 | 97.9  | ST058593        | 92.1        | ST059229   | 103.4    | ST025463 | 94.4     |      |
| ST058132 | 109.9 | ST058153 | 97.7  | ST058590        | 105.9       | ST059320   | 91.2     | ST031852 | 97.3     |      |
| ST058233 | 95.7  | ST059386 | 93.0  | ST059336        | 87.3        | ST058571   | 88.7     | ST059197 | 89.8     |      |
| ST034240 | 93.0  | ST058230 | 94.5  | ST018983        | 92.5        | ST058574   | 89.9     | ST065541 | 101.9    |      |
| ST058134 | 120.9 | ST058180 | 98.0  | ST034104        | 89.8        | ST021579   | 88.1     | ST024887 | 98.0     |      |
| ST058165 | 122.3 | ST033819 | 93.7  | ST059366        | 98.8        | ST059321   | 86.3     | ST027810 | 105.1    |      |
| ST058147 | 92.3  | ST059337 | 86.3  | ST015543        | 108.6       | ST059324   | 97.2     | ST039605 | 91.0     |      |
| ST025049 | 92.9  | ST058184 | 112.7 | ST048254        | 108.9       | ST058564   | 100.9    | ST055621 | 98.8     |      |
| ST058194 | 124.6 | ST069174 | 100.4 | ST058231        | 100.6       | ST058566   | 101.2    | ST032328 | 88.9     |      |
| ST051996 | 94.0  | ST058973 | 93.2  | ST058222        | 103.5       | ST058573   | 93.7     | ST056036 | 93.1     |      |
| ST059990 | 93.3  | ST059394 | 90.5  | <b>ST056797</b> | <b>58.7</b> | <i>hit</i> | ST058576 | 96.7     | ST040129 | 98.0 |
| ST058179 | 100.4 | ST058528 | 93.6  | ST058585        | 99.8        | ST058580   | 100.9    | ST059382 | 97.9     |      |
| ST058224 | 90.1  | ST015537 | 106.8 | ST059395        | 94.6        | ST058579   | 102.0    | ST059404 | 104.6    |      |
| ST059354 | 101.6 | ST058219 | 116.7 | ST059368        | 94.0        | ST058531   | 97.5     | ST040130 | 107.1    |      |
| ST058139 | 103.8 | ST059339 | 85.8  | ST058587        | 98.0        | ST058988   | 88.9     | ST010566 | 103.2    |      |
| ST058163 | 110.3 | ST065517 | 113.8 | ST058578        | 106.1       | ST059383   | 97.6     | ST019107 | 97.9     |      |
| ST059358 | 88.6  | ST068835 | 107.5 | ST059199        | 94.8        | ST058577   | 96.7     | ST019282 | 96.0     |      |
| ST058211 | 117.0 | ST058220 | 121.7 | ST058770        | 92.0        | ST059363   | 101.7    | ST050880 | 78.4     |      |
| ST058234 | 91.5  | ST059338 | 85.6  | ST056653        | 92.3        | ST059370   | 113.6    | ST058518 | 99.9     |      |
| ST058227 | 102.2 | ST059335 | 86.6  | ST058570        | 111.4       | ST015553   | 105.9    | ST059373 | 105.6    |      |
| ST058146 | 130.3 | ST059342 | 89.1  | ST058575        | 83.6        | ST058183   | 104.1    | ST059577 | 79.3     |      |
| ST058202 | 120.7 | ST059341 | 100.0 | ST015270        | 107.1       | ST030896   | 93.9     | ST019279 | 87.6     |      |
| ST059359 | 89.6  | ST011312 | 94.2  | ST058586        | 93.7        | ST018996   | 92.5     | ST059376 | 94.5     |      |
| ST058228 | 101.3 | ST028686 | 99.3  | ST058589        | 98.0        | ST069173   | 96.7     | ST058236 | 112.7    |      |
| ST058131 | 114.9 | ST059385 | 87.4  | ST056814        | 83.6        | ST034189   | 87.7     | ST058756 | 87.2     |      |
| ST058226 | 102.1 | ST011322 | 100.5 | ST020169        | 93.3        | ST027339   | 88.4     | ST058742 | 109.4    |      |
| ST047010 | 87.7  | ST027368 | 108.8 | ST058733        | 98.4        | ST058557   | 89.3     | ST059399 | 95.3     |      |
| ST058221 | 100.0 | ST055628 | 110.6 | ST058555        | 110.5       | ST058558   | 90.0     | ST058208 | 113.9    |      |
| ST058199 | 110.4 | ST059388 | 104.7 | ST058595        | 90.2        | ST058556   | 91.8     | ST059402 | 92.4     |      |
| ST058933 | 115.1 | ST058235 | 106.4 | ST058588        | 94.7        | ST031846   | 94.8     | ST059364 | 100.6    |      |
| ST011310 | 91.2  | ST015397 | 102.8 | ST058594        | 96.0        | ST059797   | 96.4     | ST059365 | 106.4    |      |
| ST057040 | 86.4  | ST059398 | 95.7  | ST058591        | 106.3       | ST058523   | 95.1     | ST058215 | 115.1    |      |
| ST058154 | 98.4  | ST069049 | 97.9  | ST058200        | 110.2       | ST058178   | 146.8    | ST037715 | 85.3     |      |
| ST058135 | 131.6 | ST059387 | 102.4 | ST041683        | 106.5       | ST059405   | 116.8    | ST058192 | 110.5    |      |
| ST043600 | 89.8  | ST058240 | 102.3 | ST058592        | 93.3        | ST058188   | 98.3     | ST019007 | 94.8     |      |
| ST058210 | 112.8 | ST030578 | 93.0  | ST070054        | 91.6        | ST027648   | 91.1     | ST059250 | 91.3     |      |
| ST026188 | 104.3 | ST059559 | 89.2  | ST059576        | 85.6        | ST065913   | 99.9     | ST059225 | 96.0     |      |
| ST059403 | 98.9  | ST024246 | 103.2 | ST066128        | 101.1       | ST057309   | 93.5     | ST058994 | 98.6     |      |

*Continued on next page*

Supplementary Table S1. *Continued.*

|                 |             |            |          |       |          |       |          |       |          |       |
|-----------------|-------------|------------|----------|-------|----------|-------|----------|-------|----------|-------|
| ST040648        | 95.2        |            | ST033078 | 84.8  | ST057564 | 93.0  | ST059282 | 89.3  | ST058794 | 95.6  |
| ST015520        | 110.6       |            | ST058218 | 113.7 | ST014665 | 95.5  | ST039596 | 84.8  | ST026420 | 99.0  |
| ST019044        | 86.1        |            | ST059798 | 99.9  | ST040661 | 95.8  | ST033728 | 89.2  | ST044567 | 94.0  |
| ST058145        | 121.2       |            | ST058232 | 96.4  | ST059410 | 90.6  | ST059566 | 83.4  | ST027647 | 96.4  |
| ST019028        | 97.8        |            | ST058225 | 98.6  | ST059573 | 109.7 | ST059693 | 98.8  | ST059187 | 87.3  |
| ST019040        | 93.2        |            | ST059712 | 89.1  | ST060016 | 98.2  | ST034070 | 86.8  | ST059549 | 89.1  |
| ST070098        | 93.3        |            | ST060004 | 96.5  | ST049042 | 98.0  | ST028860 | 96.5  | ST059679 | 88.2  |
| ST058825        | 90.8        |            | ST044561 | 88.7  | ST059671 | 90.3  | ST020704 | 96.9  | ST060011 | 101.3 |
| ST059400        | 91.2        |            | ST058991 | 96.1  | ST059409 | 92.5  | ST059248 | 99.2  | ST066621 | 98.5  |
| ST059371        | 106.3       |            | ST009339 | 95.5  | ST039707 | 99.1  | ST067014 | 116.6 | ST027650 | 96.7  |
| ST059705        | 90.5        |            | ST059020 | 115.8 | ST049052 | 74.7  | ST027416 | 105.1 | ST051733 | 91.8  |
| ST006235        | 93.5        |            | ST009922 | 98.3  | ST049119 | 88.5  | ST059720 | 95.1  | ST059669 | 106.8 |
| ST031848        | 97.2        |            | ST070051 | 91.5  | ST066219 | 115.2 | ST059539 | 94.5  | ST066630 | 96.9  |
| ST059401        | 86.8        |            | ST058977 | 92.7  | ST056740 | 93.3  | ST058737 | 109.7 | ST059265 | 107.0 |
| <b>ST033438</b> | <b>54.9</b> | <i>hit</i> | ST059799 | 99.4  | ST059005 | 89.1  | ST059553 | 106.3 | ST059565 | 90.4  |
| ST027661        | 102.9       |            | ST059191 | 96.8  | ST059574 | 88.1  | ST050875 | 99.6  | ST059280 | 86.6  |
| ST060018        | 101.0       |            | ST059805 | 97.8  | ST059672 | 82.2  | ST056127 | 95.9  | ST059545 | 86.7  |
| ST059697        | 84.6        |            | ST060033 | 98.9  | ST059498 | 90.9  | ST066220 | 122.8 | ST059493 | 96.8  |
| ST019001        | 92.7        |            | ST059804 | 97.2  | ST024819 | 99.4  | ST058688 | 100.9 | ST056810 | 101.2 |
| ST059374        | 98.2        |            | ST059806 | 99.7  | ST034218 | 87.7  | ST045060 | 92.1  | ST058759 | 99.9  |
| ST058997        | 93.6        |            | ST058812 | 108.7 | ST034217 | 82.1  | ST028857 | 98.7  | ST016933 | 104.3 |
| ST041113        | 96.3        |            | ST040810 | 85.7  | ST065980 | 102.2 | ST045115 | 89.2  | ST059270 | 84.6  |
| ST059803        | 105.6       |            | ST068867 | 113.7 | ST059698 | 91.6  | ST009804 | 101.9 | ST059212 | 110.3 |
| ST030919        | 93.1        |            | ST012362 | 94.8  | ST058752 | 93.0  | ST058704 | 93.0  | ST019664 | 85.9  |
| ST026169        | 98.7        |            | ST059575 | 82.6  | ST059538 | 105.1 | ST060012 | 114.9 | ST059558 | 87.6  |
| ST020707        | 104.6       |            | ST059800 | 103.0 | ST059991 | 102.1 | ST054336 | 98.5  | ST007270 | 96.2  |
| ST059808        | 101.1       |            | ST059408 | 92.7  | ST059670 | 106.4 | ST059992 | 99.3  | ST060014 | 99.8  |
| ST059406        | 97.2        |            | ST058982 | 110.7 | ST060006 | 95.7  | ST060009 | 103.5 | ST066627 | 103.1 |
| ST027566        | 109.4       |            | ST056728 | 95.1  | ST067017 | 93.3  | ST011968 | 95.0  | ST059262 | 101.7 |
| ST029608        | 86.9        |            | ST049127 | 84.3  | ST014593 | 109.8 | ST059689 | 90.4  | ST053182 | 91.5  |
| ST058197        | 110.1       |            | ST068868 | 100.9 | ST059003 | 90.5  | ST067080 | 106.1 | ST059259 | 97.7  |
| ST058229        | 106.5       |            | ST069978 | 92.9  | ST059718 | 84.7  | ST058866 | 89.9  | ST059691 | 100.6 |
| ST058237        | 104.0       |            | ST026424 | 93.9  | ST059673 | 86.3  | ST033057 | 91.3  | ST059694 | 100.6 |
| ST027011        | 94.3        |            | ST070052 | 94.4  | ST045738 | 85.8  | ST059251 | 84.2  | ST059695 | 105.8 |
| ST059380        | 115.8       |            | ST058930 | 93.6  | ST059195 | 84.4  | ST059564 | 103.8 | ST024131 | 98.5  |
| ST059379        | 105.9       |            | ST044566 | 85.5  | ST023393 | 92.6  | ST060008 | 89.7  | ST059272 | 93.2  |
| ST034062        | 90.6        |            | ST066635 | 101.3 | ST059665 | 95.5  | ST057310 | 96.1  | ST059218 | 102.9 |
| ST034063        | 97.5        |            | ST068871 | 98.4  | ST059278 | 87.7  | ST047172 | 103.9 | ST059678 | 106.6 |
| ST056811        | 99.4        |            | ST059271 | 85.9  | ST066637 | 119.1 | ST059711 | 83.9  | ST058703 | 102.1 |
| ST058207        | 114.8       |            | ST025481 | 93.9  | ST066625 | 115.7 | ST051357 | 87.8  | ST058702 | 111.9 |
| ST018989        | 92.2        |            | ST059572 | 104.2 | ST059719 | 89.3  | ST059484 | 97.1  | ST059686 | 107.6 |
| ST058213        | 123.9       |            | ST058955 | 89.7  | ST059724 | 98.6  | ST059486 | 110.1 | ST037711 | 87.4  |
| ST012135        | 91.0        |            | ST068875 | 102.9 | ST059264 | 96.9  | ST027649 | 97.9  | ST041925 | 83.3  |
| ST026203        | 106.8       |            | ST058995 | 114.0 | ST024806 | 89.2  | ST055076 | 101.0 | ST059258 | 87.1  |
| ST058239        | 101.1       |            | ST009316 | 105.0 | ST059536 | 102.5 | ST059567 | 82.6  | ST024809 | 88.5  |
| ST059710        | 87.9        |            | ST059506 | 88.9  | ST059193 | 93.8  | ST059988 | 95.4  | ST059677 | 98.6  |
| ST039594        | 84.5        |            | ST059532 | 89.5  | ST059708 | 114.0 | ST059509 | 93.1  | ST059999 | 98.8  |
| ST055882        | 100.4       |            | ST058699 | 103.2 | ST059548 | 87.7  | ST059279 | 87.6  | ST059989 | 94.5  |
| ST057567        | 94.5        |            | ST070001 | 97.8  | ST051739 | 93.6  | ST066521 | 105.3 | ST059535 | 97.5  |
| ST059571        | 92.6        |            | ST037776 | 82.2  | ST014592 | 102.8 | ST059185 | 86.2  | ST058922 | 86.3  |
| ST059497        | 93.9        |            | ST059192 | 112.1 | ST059563 | 93.0  | ST059184 | 88.5  | ST066228 | 98.4  |
| ST040638        | 93.0        |            | ST059489 | 96.5  | ST059267 | 88.5  | ST059675 | 97.3  | ST059274 | 97.2  |
| ST029446        | 115.4       |            | ST059485 | 104.3 | ST059228 | 99.2  | ST059194 | 88.7  | ST059681 | 85.9  |
| ST044643        | 92.9        |            | ST058754 | 90.9  | ST059823 | 91.7  | ST057290 | 97.1  | ST059178 | 90.3  |
| ST059562        | 86.3        |            | ST059285 | 112.9 | ST027769 | 103.7 | ST059230 | 102.0 | ST058683 | 101.5 |

*Continued on next page*

Supplementary Table S1. *Continued.*

|          |       |          |       |          |       |          |       |          |       |
|----------|-------|----------|-------|----------|-------|----------|-------|----------|-------|
| ST059680 | 83.6  | ST059227 | 98.8  | ST059477 | 101.9 | ST066622 | 95.2  | ST040654 | 94.4  |
| ST060017 | 92.2  | ST067054 | 97.7  | ST059701 | 88.5  | ST034149 | 86.4  | ST040710 | 100.7 |
| ST059966 | 97.7  | ST059491 | 95.4  | ST066148 | 100.2 | ST059527 | 116.8 | ST027610 | 99.8  |
| ST037579 | 94.8  | ST059276 | 90.4  | ST059811 | 116.0 | ST027790 | 93.5  | ST059025 | 89.7  |
| ST059982 | 93.2  | ST058993 | 93.2  | ST059253 | 94.6  | ST066245 | 94.0  | ST059985 | 98.4  |
| ST059480 | 90.0  | ST014539 | 111.5 | ST059983 | 100.2 | ST059288 | 88.7  | ST031662 | 96.8  |
| ST059533 | 99.0  | ST026418 | 102.0 | ST026419 | 101.7 | ST059231 | 94.3  | ST059243 | 93.6  |
| ST059980 | 96.0  | ST059546 | 89.6  | ST059996 | 91.0  | ST066620 | 91.2  | ST057286 | 104.9 |
| ST059275 | 103.7 | ST051006 | 90.3  | ST058948 | 99.6  | ST067016 | 101.1 | ST059474 | 95.0  |
| ST067019 | 96.9  | ST059674 | 84.9  | ST066619 | 93.2  | ST040647 | 96.0  | ST034175 | 81.7  |
| ST059494 | 93.8  | ST040663 | 100.1 | ST059266 | 94.5  | ST066207 | 111.4 | ST019600 | 98.3  |
| ST059692 | 99.9  | ST058746 | 104.8 | ST059263 | 85.5  | ST058706 | 92.9  | ST034152 | 93.4  |
| ST059696 | 90.3  | ST058824 | 96.6  | ST059226 | 99.7  | ST060010 | 93.5  | ST040713 | 89.9  |
| ST039323 | 99.4  | ST058705 | 95.3  | ST059495 | 101.4 | ST057301 | 93.7  | ST057297 | 103.0 |
| ST050852 | 100.3 | ST059268 | 85.5  | ST027636 | 91.5  | ST060013 | 95.5  | ST059483 | 94.0  |
| ST059505 | 94.2  | ST059688 | 90.5  | ST059277 | 84.2  | ST057300 | 109.9 | ST051008 | 100.8 |
| ST066618 | 97.1  | ST066617 | 112.6 | ST026255 | 100.9 | ST059490 | 91.5  | ST059525 | 88.5  |
| ST045032 | 106.6 | ST059496 | 110.8 | ST059557 | 89.4  | ST059687 | 114.2 | ST066631 | 96.1  |
| ST059998 | 92.0  | ST059189 | 89.4  | ST057295 | 96.1  | ST066629 | 99.8  | ST040054 | 100.8 |
| ST066636 | 110.1 | ST014583 | 99.5  | ST059685 | 97.5  | ST039661 | 86.8  | ST058989 | 88.4  |
| ST059555 | 83.9  | ST059684 | 91.7  | ST066623 | 104.6 | ST059518 | 95.3  | ST039684 | 92.0  |
| ST059223 | 89.9  | ST059977 | 108.7 | ST057279 | 108.3 | ST059819 | 100.9 | ST053447 | 89.4  |
| ST059568 | 93.6  | ST055652 | 90.0  | ST040147 | 104.4 | ST057299 | 101.5 | ST009247 | 101.9 |
| ST059721 | 104.9 | ST059188 | 94.9  | ST040688 | 99.6  | ST034151 | 94.6  | ST051041 | 100.4 |
| ST059690 | 89.5  | ST059196 | 90.5  | ST069962 | 95.4  | ST059723 | 108.5 | ST059676 | 93.4  |
| ST059570 | 91.3  | ST044583 | 90.7  | ST060003 | 118.8 | ST059528 | 90.8  | ST057245 | 104.5 |
| ST059517 | 95.4  | ST016587 | 98.6  | ST060005 | 95.0  | ST059521 | 90.5  | ST029373 | 93.5  |
| ST066522 | 111.0 | ST059975 | 97.4  | ST059995 | 117.9 | ST059987 | 109.6 | ST031051 | 101.7 |
| ST066149 | 114.0 | ST059492 | 87.7  | ST059974 | 89.4  | ST059706 | 98.5  | ST059006 | 88.4  |
| ST059561 | 82.4  | ST059284 | 95.8  | ST059979 | 94.9  | ST059233 | 90.7  | ST040050 | 94.7  |
| ST025612 | 90.2  | ST051004 | 87.3  | ST059551 | 88.3  | ST019179 | 97.1  | ST040707 | 94.2  |
| ST059526 | 96.3  | ST019612 | 99.6  | ST059182 | 111.3 | ST059965 | 90.6  | ST054849 | 98.2  |
| ST034174 | 90.5  | ST030579 | 93.8  | ST068931 | 90.9  | ST058990 | 82.4  | ST059479 | 93.0  |
| ST059256 | 85.7  | ST058686 | 106.6 | ST067018 | 96.5  | ST037335 | 89.4  | ST059972 | 87.8  |
| ST039595 | 82.7  | ST053449 | 77.5  | ST059482 | 90.6  | ST047506 | 104.1 | ST059249 | 93.0  |
| ST040897 | 89.2  | ST039696 | 89.7  | ST059179 | 96.3  | ST066626 | 116.4 | ST055344 | 90.9  |
| ST040631 | 85.7  | ST059994 | 111.1 | ST059481 | 90.9  | ST060001 | 100.8 | ST065961 | 103.2 |
| ST059257 | 93.0  | ST065524 | 97.2  | ST059997 | 97.7  | ST058701 | 102.0 | ST027881 | 94.1  |
| ST059511 | 98.4  | ST014531 | 101.7 | ST007535 | 99.2  | ST027859 | 96.1  | ST040650 | 106.9 |
| ST059186 | 85.8  | ST059812 | 95.4  | ST058120 | 107.0 | ST040090 | 88.8  | ST026257 | 96.0  |
| ST058684 | 94.7  | ST057284 | 99.0  | ST040627 | 107.0 | ST040580 | 89.9  | ST019628 | 99.4  |
| ST059810 | 104.9 | ST056193 | 115.1 | ST059813 | 101.1 | ST040694 | 104.2 | ST040105 | 97.0  |
| ST059255 | 110.9 | ST059973 | 90.7  | ST059246 | 109.7 | ST040660 | 104.7 | ST040808 | 82.4  |
| ST040681 | 96.5  | ST065979 | 107.0 | ST057304 | 94.5  | ST014514 | 95.9  | ST040626 | 104.3 |
| ST060000 | 101.4 | ST059814 | 97.3  | ST020706 | 98.3  | ST024801 | 95.1  | ST030117 | 105.5 |
| ST057308 | 96.7  | ST008396 | 95.6  | ST057733 | 107.4 | ST040336 | 99.0  | ST016586 | 100.0 |
| ST059478 | 114.9 | ST040033 | 101.2 | ST040016 | 106.7 | ST023411 | 97.7  | ST058403 | 91.8  |
| ST040007 | 103.8 | ST040657 | 101.4 | ST060002 | 99.8  | ST053451 | 111.7 | ST040568 | 96.1  |
| ST014601 | 98.6  | ST026444 | 98.4  | ST030577 | 94.1  | ST029046 | 106.5 | ST040807 | 106.1 |
| ST058388 | 96.0  | ST039653 | 81.5  | ST029617 | 98.3  | ST008380 | 93.6  | ST040013 | 87.7  |
| ST029227 | 91.3  | ST034150 | 90.3  | ST018738 | 94.3  | ST027798 | 98.3  | ST034069 | 91.7  |
| ST057285 | 93.1  | ST040651 | 97.1  | ST001113 | 99.4  | ST039602 | 89.4  | ST031178 | 95.6  |
| ST039281 | 91.5  | ST040659 | 100.1 | ST039692 | 83.0  | ST039601 | 91.4  | ST040655 | 98.4  |
| ST059816 | 103.5 | ST059709 | 91.7  | ST059578 | 88.8  | ST040006 | 98.0  | ST040809 | 92.8  |
| ST059530 | 95.3  | ST059984 | 104.3 | ST038015 | 83.0  | ST040011 | 99.4  | ST001350 | 96.3  |

*Continued on next page*

Supplementary Table S1. *Continued.*

|          |       |          |       |          |       |          |       |          |       |
|----------|-------|----------|-------|----------|-------|----------|-------|----------|-------|
| ST057296 | 96.7  | ST057288 | 113.2 | ST008377 | 105.4 | ST031179 | 93.1  | ST055881 | 103.8 |
| ST024955 | 102.5 | ST040624 | 94.7  | ST019634 | 92.2  | ST040738 | 89.8  | ST040262 | 88.2  |
| ST050961 | 81.3  | ST059252 | 88.3  | ST039693 | 87.4  | ST057402 | 105.6 | ST027802 | 102.8 |
| ST040760 | 93.6  | ST039683 | 88.3  | ST039695 | 92.9  | ST065904 | 94.5  | ST025551 | 93.3  |
| ST059234 | 97.4  | ST027932 | 103.5 | ST031180 | 95.3  | ST059520 | 89.5  | ST040677 | 97.6  |
| ST059821 | 94.8  | ST049051 | 85.0  | ST059180 | 94.5  | ST059981 | 93.3  | ST040776 | 92.1  |
| ST059181 | 97.3  | ST059018 | 103.9 | ST058687 | 101.4 | ST027800 | 100.7 | ST056190 | 102.1 |
| ST059683 | 85.1  | ST057302 | 92.0  | ST057283 | 99.2  | ST057076 | 100.0 | ST069285 | 100.2 |
| ST039685 | 101.5 | ST057282 | 95.7  | ST051737 | 98.2  | ST026258 | 97.8  | ST040610 | 90.0  |
| ST005150 | 103.2 | ST059815 | 98.8  | ST057281 | 93.7  | ST017364 | 98.2  | ST040662 | 94.1  |
| ST059534 | 92.7  | ST059514 | 102.1 | ST051003 | 93.4  | ST028456 | 96.0  | ST059971 | 92.2  |
| ST057298 | 100.4 | ST059476 | 95.4  | ST059235 | 99.4  | ST039582 | 99.8  | ST066232 | 98.4  |
| ST058395 | 84.8  | ST069841 | 96.7  | ST065797 | 94.4  | ST040607 | 97.8  | ST059969 | 109.0 |
| ST024293 | 96.5  | ST049568 | 101.2 | ST039691 | 84.6  | ST026467 | 98.0  | ST054908 | 98.0  |
| ST029216 | 92.0  | ST040818 | 92.8  | ST040069 | 98.4  | ST014579 | 96.7  | ST025116 | 94.3  |
| ST059993 | 104.7 | ST059348 | 86.1  | ST026417 | 100.6 | ST017369 | 96.5  | ST017367 | 100.9 |
| ST059822 | 94.4  | ST059970 | 110.1 | ST057287 | 107.1 | ST005149 | 98.7  | ST027794 | 96.4  |
| ST019200 | 90.4  | ST058996 | 91.1  | ST040113 | 92.2  | ST009312 | 99.8  | ST031176 | 104.1 |
| ST027845 | 93.6  | ST040248 | 91.5  | ST028827 | 106.7 | ST066520 | 99.6  | ST040609 | 96.4  |
| ST058987 | 89.1  | ST059221 | 101.1 | ST057289 | 94.4  | ST059512 | 115.6 | ST029615 | 93.3  |
| ST051051 | 92.3  | ST008394 | 93.9  | ST026995 | 94.4  | ST039597 | 75.3  | ST065868 | 91.6  |
| ST039820 | 94.6  | ST039706 | 89.3  | ST059702 | 89.6  | ST027937 | 110.4 | ST038877 | 85.5  |
| ST059809 | 101.0 | ST051002 | 83.0  | ST040652 | 95.3  | ST025107 | 93.0  | ST018704 | 108.8 |
| ST059254 | 97.5  | ST059976 | 103.4 | ST040064 | 109.9 | ST017371 | 99.2  | ST040263 | 100.2 |
| ST017365 | 99.0  | ST014575 | 100.9 | ST031267 | 104.2 | ST017363 | 99.0  | ST016439 | 94.3  |
| ST051175 | 83.9  | ST053889 | 110.7 | ST040761 | 97.0  | ST016159 | 97.1  | ST040625 | 101.2 |
| ST059818 | 103.3 | ST034153 | 98.6  | ST039936 | 98.6  | ST053095 | 86.3  | ST040338 | 90.2  |
| ST059820 | 110.9 | ST040612 | 97.6  | ST059244 | 97.6  | ST057307 | 92.2  | ST025111 | 99.6  |
| ST053450 | 101.6 | ST059967 | 102.5 | ST058700 | 101.5 | ST040623 | 97.5  | ST016156 | 101.8 |
| ST040608 | 111.7 | ST059507 | 92.3  | ST007021 | 97.1  | ST066230 | 99.4  | ST019098 | 95.1  |
| ST059978 | 113.8 | ST014495 | 96.3  | ST066146 | 109.2 | ST057557 | 93.3  | ST040454 | 112.9 |
| ST007537 | 100.7 | ST012555 | 92.6  | ST025105 | 92.1  |          |       |          |       |
| ST012552 | 106.6 | ST026468 | 102.9 | ST039980 | 106.7 |          |       |          |       |
| ST040722 | 97.8  | ST025115 | 91.7  | ST020683 | 94.4  |          |       |          |       |
| ST031682 | ????? | ST035363 | 94.4  | ST025591 | 102.0 |          |       |          |       |
| ST040682 | 97.0  | ST026252 | 108.1 | ST012454 | 95.9  |          |       |          |       |
| ST056192 | 103.7 | ST026261 | 98.9  | ST027895 | 100.9 |          |       |          |       |
| ST016158 | 102.8 | ST027796 | 91.2  | ST010162 | 108.9 |          |       |          |       |
| ST039697 | 94.7  | ST001292 | 94.8  | ST040633 | 91.1  |          |       |          |       |
| ST025110 | 100.6 | ST006389 | 81.5  | ST039987 | 104.2 |          |       |          |       |
| ST017366 | 96.8  | ST019092 | 92.2  | ST055264 | 87.0  |          |       |          |       |
| ST040552 | 91.2  | ST055135 | 100.5 | ST058108 | 100.8 |          |       |          |       |
| ST019093 | 93.6  | ST069314 | 96.7  | ST016624 | 102.6 |          |       |          |       |
| ST008378 | 91.8  | ST009330 | 94.1  | ST025552 | 99.2  |          |       |          |       |
| ST029018 | 101.3 | ST039612 | 89.2  | ST040903 | 91.5  |          |       |          |       |
| ST013863 | 94.0  | ST025112 | 109.0 | ST012500 | 101.4 |          |       |          |       |
| ST012513 | 101.4 | ST040586 | 99.7  | ST055332 | 93.4  |          |       |          |       |
| ST020705 | 96.9  | ST040630 | 93.0  | ST040370 | 99.1  |          |       |          |       |
| ST014528 | 101.8 | ST026551 | 93.1  | ST040023 | 96.7  |          |       |          |       |
| ST056191 | 98.1  | ST039711 | 95.1  | ST008954 | 95.5  |          |       |          |       |
| ST025109 | 98.3  | ST039611 | 99.5  | ST026423 | 97.2  |          |       |          |       |
| ST037805 | 83.2  | ST039616 | 82.1  | ST040340 | 93.9  |          |       |          |       |
| ST023394 | 98.5  | ST033441 | 93.7  | ST055620 | 95.0  |          |       |          |       |
| ST057278 | 96.7  | ST025113 | 96.7  | ST040567 | 83.4  |          |       |          |       |
| ST040343 | 82.5  | ST026464 | 105.8 | ST040333 | 110.1 |          |       |          |       |

*Continued on next page*

Supplemental Table S1. *Continued.*

---

|          |       |          |       |          |       |
|----------|-------|----------|-------|----------|-------|
| ST040789 | 99.7  | ST030885 | 95.5  | ST055632 | 90.2  |
| ST027849 | 90.2  | ST056045 | 98.2  | ST009331 | 91.7  |
| ST040656 | 93.8  | ST040736 | 104.2 | ST040721 | 102.5 |
| ST019190 | 98.2  | ST040533 | 109.5 | ST024144 | 97.7  |
| ST016157 | 108.7 | ST054675 | 97.3  | ST040635 | 88.1  |
| ST014591 | 101.1 | ST040737 | 103.8 | ST025236 | 93.5  |
| ST007403 | 99.3  | ST028624 | 94.7  | ST040759 | 90.1  |
| ST040247 | 100.3 | ST039620 | 86.6  | ST014586 | 94.7  |
| ST040603 | 104.0 | ST019598 | 96.0  | ST058652 | 98.4  |
| ST035442 | 87.2  | ST035447 | 80.1  |          |       |
| ST054635 | 98.5  | ST037059 | 85.0  |          |       |
| ST016585 | 97.4  | ST057735 | 96.1  |          |       |
| ST040335 | 106.6 | ST024388 | 91.9  |          |       |
| ST040330 | 94.1  | ST035450 | 82.8  |          |       |
| ST014519 | 97.9  | ST054799 | 93.8  |          |       |
| ST014590 | 99.5  | ST027793 | 92.2  |          |       |
| ST016154 | 102.8 | ST011910 | 104.2 |          |       |
| ST040379 | 102.3 | ST021061 | 89.5  |          |       |
| ST026259 | 96.1  | ST026260 | 99.9  |          |       |
| ST025106 | 94.3  | ST040775 | 88.8  |          |       |
| ST012315 | 95.6  | ST040249 | 96.2  |          |       |
| ST027558 | 106.8 | ST040720 | 93.6  |          |       |

---

**Supplementary Table S2.** Effects of Saquinavir(SQV) and ST033438(334), on the activity of 58 proteases.

| Protease Name                     | SQV (25 μM)  | SQV (5 μM)   | 334 (20 μM)  | 334 (1 μM)   | Positive |
|-----------------------------------|--------------|--------------|--------------|--------------|----------|
| 20S Proteasome                    | 46.29        | 0.15         | 18.16        | 6.68         | 97.81    |
| ACE                               | 5.92         | 9.93         | 12.42        | 2.79         | 90.62    |
| ACE2                              | -1.44        | 5.96         | 3.06         | -3.82        | 94.10    |
| ADAM10                            | 16.71        | 11.86        | <b>79.66</b> | 8.48         | 107.98   |
| ADAM17                            | -20.38       | -8.75        | 0.05         | -1.89        | 85.03    |
| Airway trypsin-like protease/HAT  | -7.80        | -0.32        | -4.17        | 0.39         | N/A      |
| Caspase-1                         | 40.41        | 27.25        | 30.66        | 30.02        | 99.30    |
| Caspase-2                         | 15.89        | 20.49        | 18.55        | 4.20         | 78.97    |
| Caspase-3                         | 2.75         | 2.52         | -4.58        | -0.84        | 99.81    |
| Caspase-4                         | 19.83        | 6.68         | 24.00        | 0.87         | 70.56    |
| Caspase-5                         | -75.13       | -19.84       | -27.46       | -7.84        | 104.26   |
| Caspase-6                         | 6.44         | 29.79        | 19.77        | 16.62        | 75.11    |
| Caspase-7                         | 2.41         | 0.14         | 0.91         | 3.05         | 100.00   |
| Caspase-8                         | 13.24        | 13.83        | 11.18        | 7.49         | 99.13    |
| Caspase-9                         | -1.56        | -1.95        | -9.75        | -5.83        | 90.57    |
| Caspase-10                        | -130.63      | -34.92       | -61.18       | -14.02       | 98.30    |
| Cathepsin B                       | 5.93         | 4.09         | 8.29         | 3.81         | 99.61    |
| Cathepsin E                       | <b>63.32</b> | 35.36        | 3.41         | 8.56         | 107.32   |
| Cathepsin G                       | -391.16      | -78.02       | 10.54        | 2.44         | 83.36    |
| Cathepsin H                       | -27.44       | 10.06        | 9.36         | 10.88        | 83.85    |
| Cathepsin K                       | 16.46        | 4.62         | 19.95        | -5.11        | 99.01    |
| Cathepsin L                       | 20.02        | 21.02        | 29.23        | -2.13        | 96.44    |
| Cathepsin S                       | 0.86         | -0.36        | -5.96        | 3.87         | 86.35    |
| Cathepsin V                       | <b>98.89</b> | <b>92.57</b> | <b>84.12</b> | <b>88.81</b> | 95.91    |
| Cathepsin X/Z/P                   | -5.05        | 15.64        | 30.38        | 17.55        | 95.97    |
| Complement C1r Subcomponent       | -49.43       | -30.97       | 1.37         | -0.74        | N/A      |
| Complement C1s Subcomponent       | -116.58      | -29.98       | 0.62         | 7.33         | N/A      |
| Complement Component C2           | 36.86        | 23.99        | 9.65         | -1.39        | N/A      |
| Complement MASP3 Catalytic Domain | -81.98       | 10.45        | -4.74        | 9.31         | N/A      |
| DPP3                              | 22.24        | 9.27         | 8.68         | 0.72         | 98.64    |
| DPP4                              | -31.46       | -28.10       | -10.59       | -12.78       | 99.32    |
| DPP7                              | -0.47        | 2.72         | 0.38         | -6.65        | 66.22    |
| DPP8                              | 8.15         | 3.81         | 16.68        | 2.31         | 98.09    |
| DPP9                              | 10.44        | 19.91        | 16.16        | 8.86         | 98.20    |
| Factor Xa                         | -153.44      | -31.01       | -31.08       | 6.68         | 119.08   |
| Factor Xlla                       | -13.11       | -9.62        | -1.49        | -0.23        | 102.82   |
| FAP                               | 17.47        | -2.35        | 12.88        | 1.40         | 86.78    |
| HIV-1                             | <b>91.20</b> | <b>85.68</b> | 47.05        | -21.62       | 94.44    |
| KLK-1                             | 5.44         | 10.66        | 4.52         | 3.05         | 72.36    |
| KLK-2                             | 7.36         | 12.80        | 7.88         | 7.22         | 96.35    |
| KLK-5                             | -206.31      | -5.19        | 45.09        | 11.15        | 69.62    |
| Legumain                          | <b>55.33</b> | -0.57        | 6.17         | -19.00       | 97.13    |
| Marapsin/Pancreasin               | 21.19        | 7.25         | 13.31        | -7.06        | N/A      |
| Matriptase/ST14 Catalytic Domain  | 10.67        | 12.00        | 12.25        | 9.30         | N/A      |
| MMP1                              | 1.20         | 4.55         | 3.30         | -1.79        | 99.89    |
| Neprilysin                        | -14.81       | 6.61         | -29.21       | -14.43       | 97.32    |
| Neprilysin 2                      | -20.48       | 11.95        | 10.51        | 32.99        | 93.20    |
| Neutrophil Elastase               | 0.42         | 2.78         | -0.43        | 0.40         | 99.88    |
| Pepsin                            | -3.90        | -8.63        | -5.98        | -1.56        | 100.16   |
| Prolyl oligopeptidase/PreP        | 14.63        | 9.72         | 2.34         | -4.43        | 99.09    |
| Proteinase 3                      | 5.80         | 15.81        | 35.39        | 19.91        | 72.42    |
| Renin                             | 18.14        | 14.82        | 4.23         | 4.01         | 100.1    |
| Thrombin                          | 10.78        | 8.71         | 3.38         | -4.97        | 99.64    |
| Tissue plasminogen activator      | 3.11         | 11.26        | -0.95        | -2.06        | 100.73   |
| Trypsin                           | -252.27      | -125.06      | -104.21      | 1.27         | 99.86    |
| Tryptase ε /BSSP4                 | -22.78       | -22.65       | -54.87       | -0.89        | N/A      |
| Tryptase, ε II                    | -3.14        | 3.84         | 0.07         | 5.00         | 94.29    |
| u-Plasminogen activator/Urokinase | 10.05        | -3.74        | -1.79        | -8.13        | 99.32    |



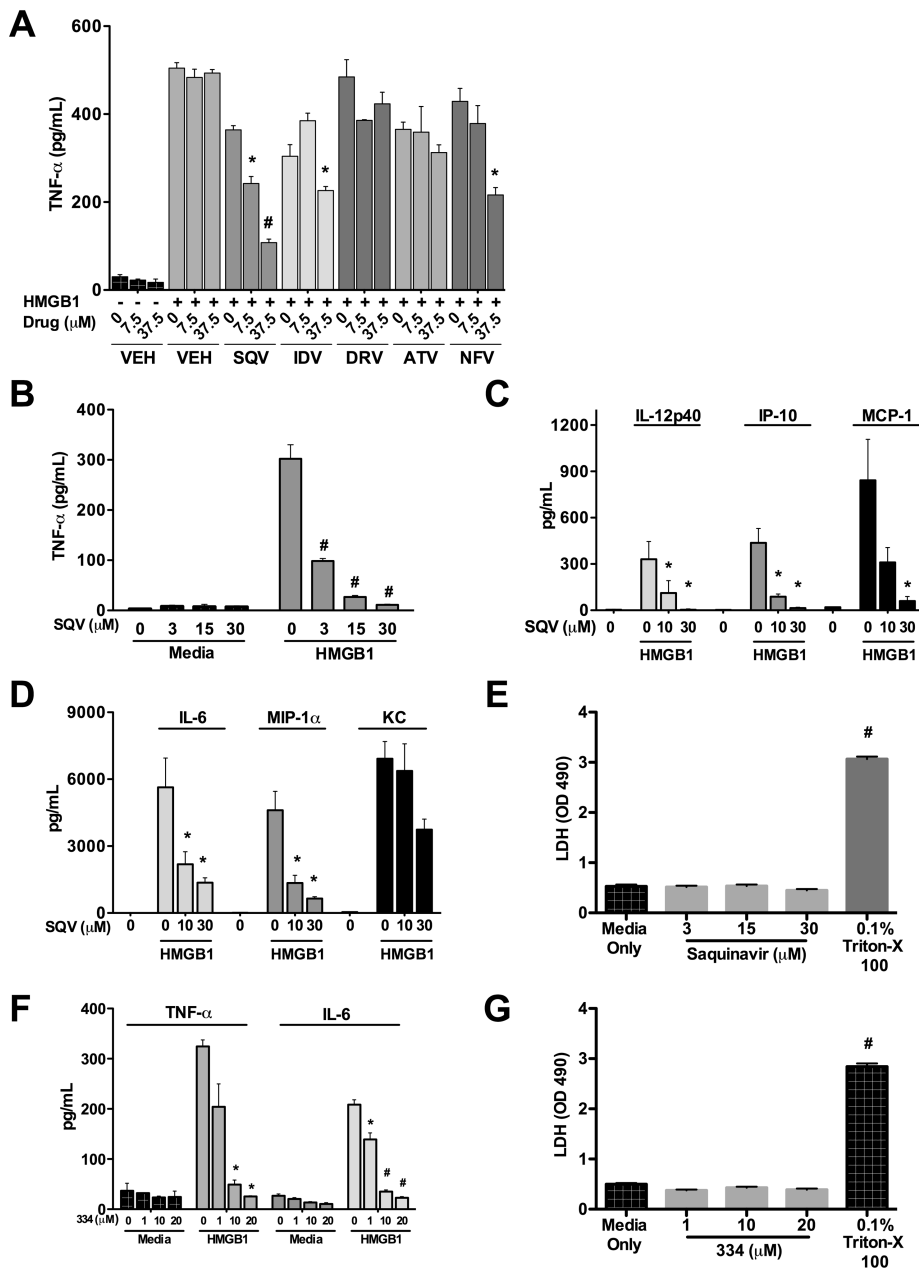

**Supplementary Figure S1.** Protease inhibitor screen in mouse peritoneal macrophages identifies saquinavir (SQV) and ST033438 (334) as potent inhibitors of HMGB1-induced TNF- $\alpha$  production. (A) The effect of various first generation protease inhibitors on HMGB1-induced TNF- $\alpha$  production in mouse peritoneal macrophages was assessed by ELISA (VEH, vehicle; SQV, saquinavir; IDV, Indinavir; DRV, Darunavir; LPV, Lopinavir; ATV, Atazanavir; NFV, Nelfinavir). Cells were pre-treated for 1 h with drug followed by 18 h of HMGB1 stimulation. (B) Dose-dependent effect of SQV on HMGB1-induced TNF- $\alpha$  production in mouse peritoneal macrophages. (C, D) Dose-dependent effect of SQV on HMGB1-induced IL12p40, IP10, MCP-1, IL6, MIP-1 $\alpha$ , and KC production in mouse peritoneal macrophages measured by luminex. (E) Cytotoxicity of SQV was determined by measuring LDH release by mouse peritoneal macrophages after 18 h treatment. (F) Effect of STO33438 (334) on HMGB1-induced TNF- $\alpha$  and IL6 release in mouse peritoneal macrophages. (G) Cytotoxicity of 334 was determined by measuring LDH release by mouse peritoneal macrophages after 18 h treatment.

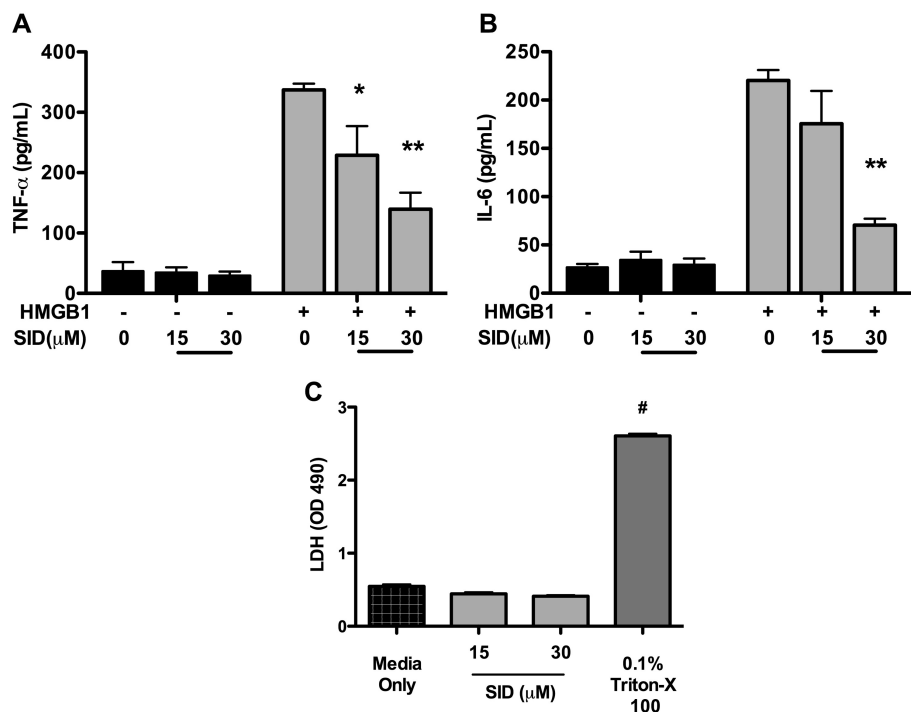

**Supplementary Figure S2.** The cathepsin inhibitor SID is non-toxic and inhibits HMGB1 induced TNF- $\alpha$  and IL-6 in mouse peritoneal macrophages. (A) Dose dependent effect of SID on HMGB1-induced TNF- $\alpha$  production in mouse peritoneal macrophages and (B) dose dependent effect of SID on HMGB1-induced IL-6 production in mouse peritoneal macrophages assessed by ELISA after 1 h of drug pre-treatment followed by 18 h HMGB1 stimulation (C) Cytotoxicity of SID was determined by measuring LDH release in mouse peritoneal macrophages after 18 h treatment.

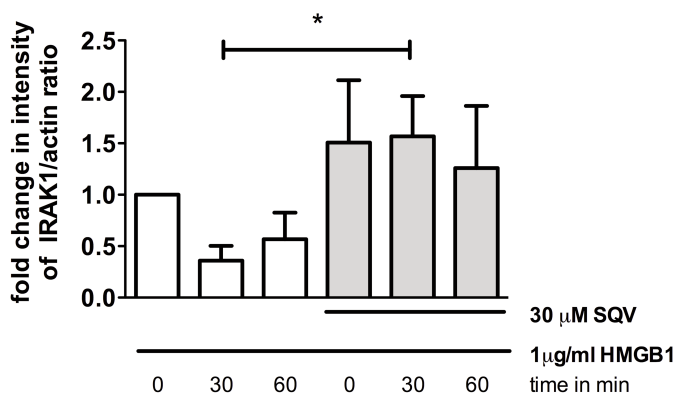

**Supplementary Figure S3.** Quantitated effect of SQV on HMGB1-induced IRAK-1 protein expression. This presents a quantitation of the representative Western blot shown in Fig 3G and includes 4 independent experiments. Band intensities were measured using ImageJ ([imagej.nih.gov/ij/](http://imagej.nih.gov/ij/) a Java-based image processing program) (\* $P < 0.05$ ).

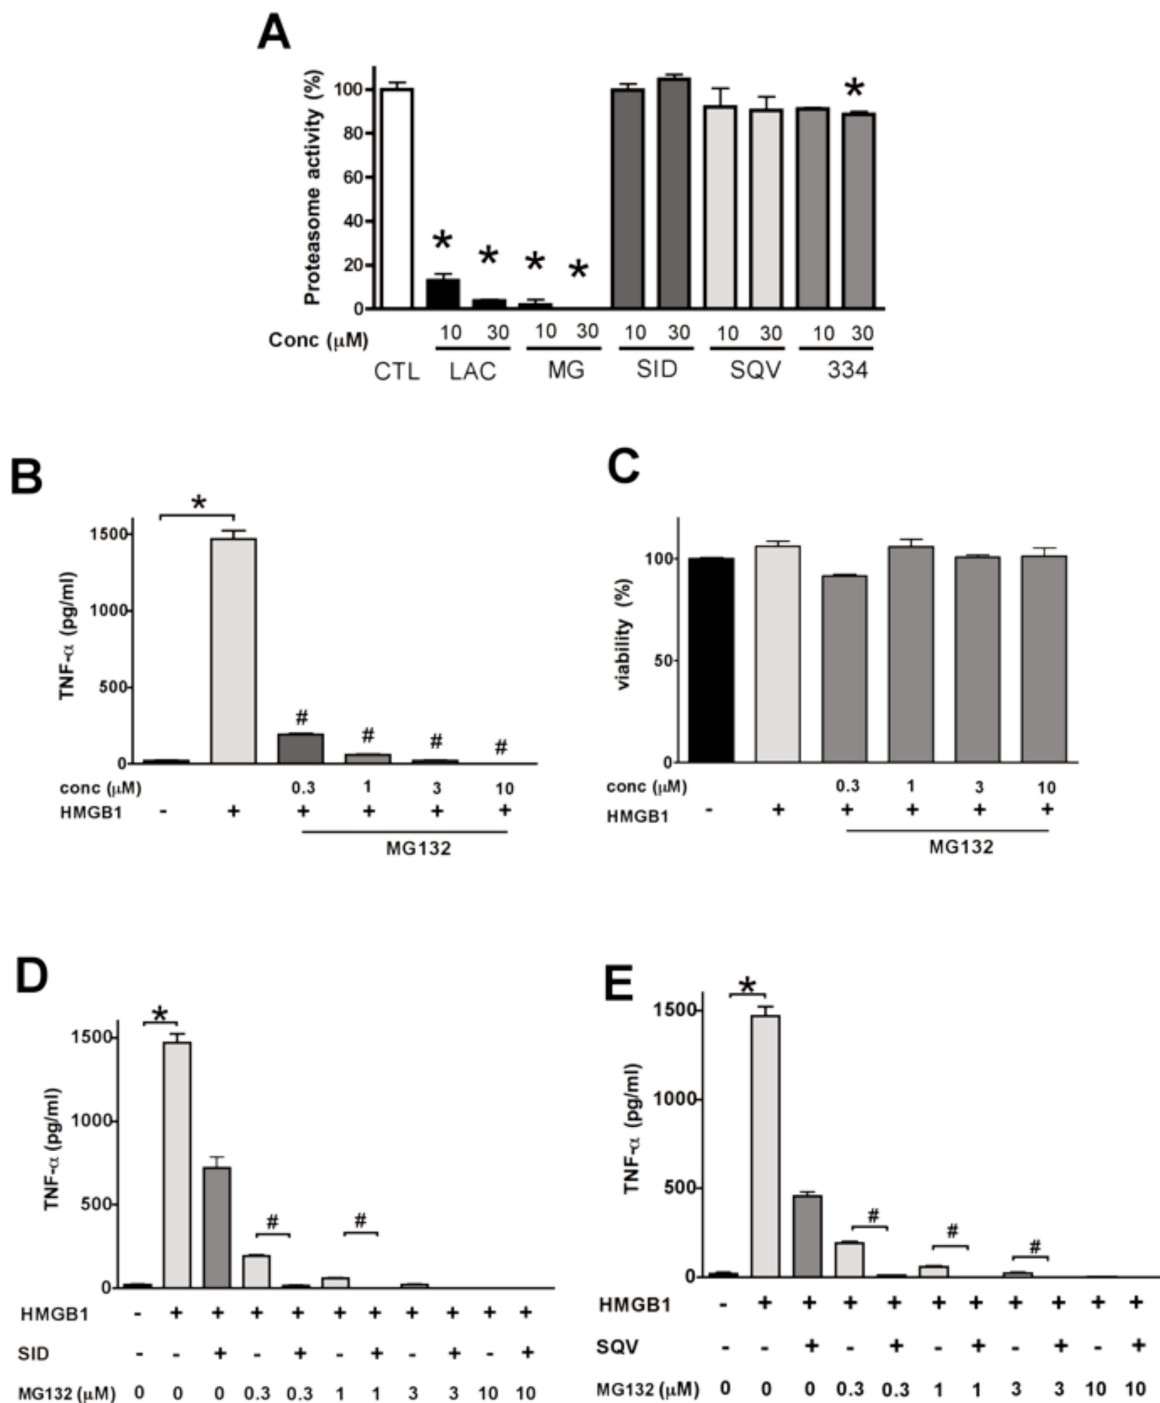

**Supplementary Figure S4.** The mode of action of Saquinavir (SQV) and ST033438 (334) does not rely on proteasome activity. (A) The effect of SQV, 334 and the cathepsin V inhibitor SID on proteasome activity was tested in a 20S proteasome assay (the catalytic core of the 26S proteasome complex) at 10 and 30  $\mu$ M. The proteasome inhibitor lactacystin (LAC) and MG132 (MG, N(benzyloxycarbonyl) leucylleucylleucinal, Z-Leu-Leu-Leu-al) inhibited proteasome activity by more than 80%, while none of the other compounds resulted in significant changes in proteasome activity at 10  $\mu$ M, and only 334 caused a significant decrease at 30  $\mu$ M. (B) The proteasome inhibitor MG132 dose-dependently blocked the TNF- $\alpha$  production induced by HMGB1 (5  $\mu$ g/ml, 18 hours) in human monocyte-derived macrophages (C) without interfering with cellular viability as assessed by the MTT viability assay. (D) The cathepsin V inhibitor SID and (E) the HIV protease inhibitor SQV potentiate the inhibition by MG132 on HMGB1-induced TNF- $\alpha$  production in human monocyte-derived macrophages (Data presented as mean+SEM, \*  $p < 0.05$ , #  $p < 0.05$  compared to respective groups).

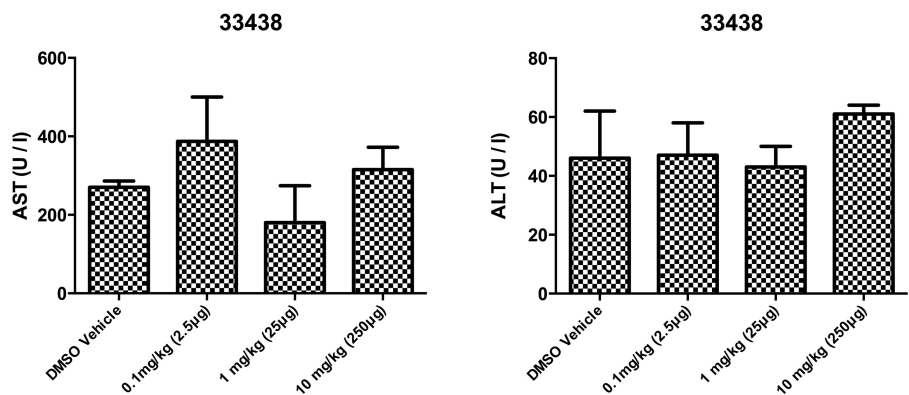

**Supplementary Figure S5.** Assessment of *in vivo* toxicity of compound 334 Male BALB/c were treated with compound 334(38) at a dose of 0.1, 1.0, and 10 mg/kg or vehicle alone (i.p. in 200µl PBS-DMSO) per day for 3 d followed by measuring plasma ALT and AST levels. Based on these findings, we chose a dose of 5mg/kg for our CLP model presented in Figure 4B.

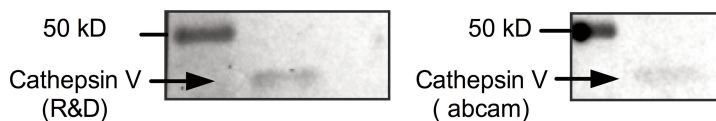

**Supplementary Figure S6.** Cathepsin V expression in freshly isolated PBMC Western blot analysis of human PBMC probed against cathepsin V. Expression of cathepsin V in human blood was confirmed using two different antibodies against cathepsin V.
